# Supplementary material for: Glycosylation of 6-methylflavone by the strain Isaria fumosorosea KCH J2
Source: PubMed Central journal article supplement (PMC5628805; doi:10.1371/journal.pone.0184885), 2017-10-05
Supplement: pone.0184885.s002.pdf [file pone.0184885.s002.pdf]

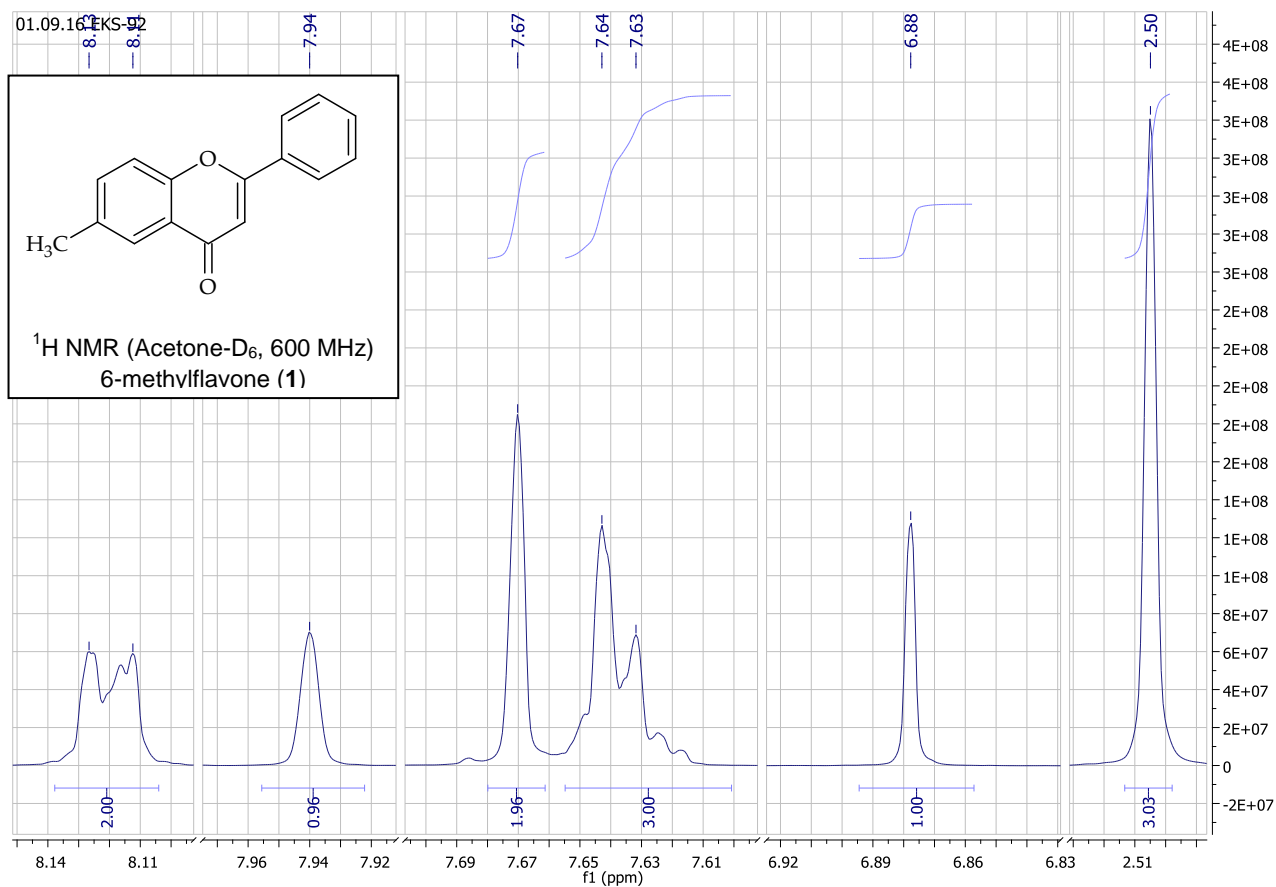

**S2 Fig.** <sup>1</sup>H NMR spectrum of 6-methylflavone (1) (Acetone-D<sub>6</sub>, 600 MHz).
