# Supplementary material for: Glycosylation of 6-methylflavone by the strain Isaria fumosorosea KCH J2
Source: PubMed Central journal article supplement (PMC5628805; doi:10.1371/journal.pone.0184885), 2017-10-05
Supplement: pone.0184885.s003.pdf [file pone.0184885.s003.pdf]

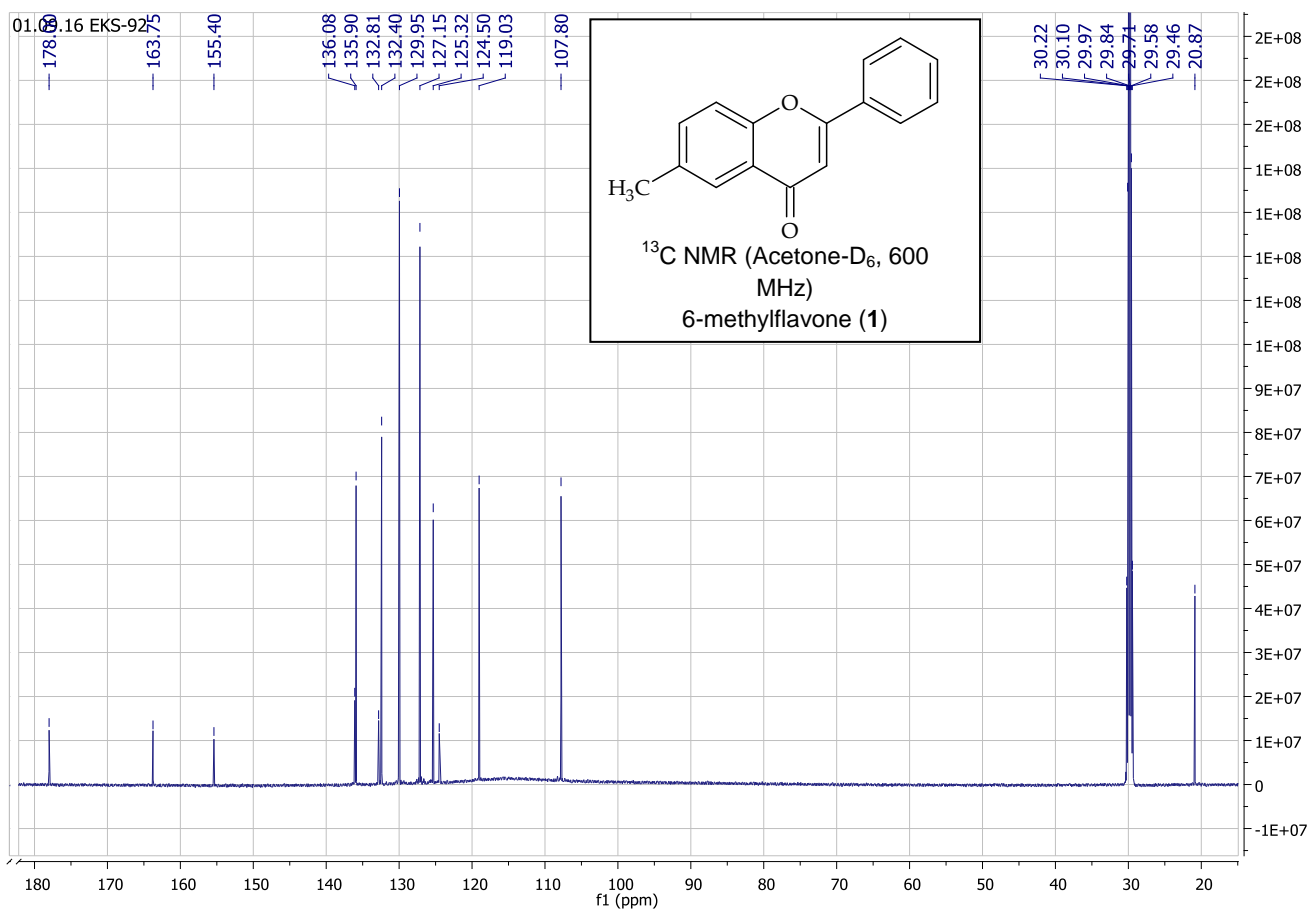

S3 Fig. <sup>13</sup>C NMR spectrum of 6-methylflavone (1) (Acetone-D<sub>6</sub>, 600 MHz).
