# Supplementary material for: Glycosylation of 6-methylflavone by the strain Isaria fumosorosea KCH J2
Source: PubMed Central journal article supplement (PMC5628805; doi:10.1371/journal.pone.0184885), 2017-10-05
Supplement: pone.0184885.s012.pdf [file pone.0184885.s012.pdf]

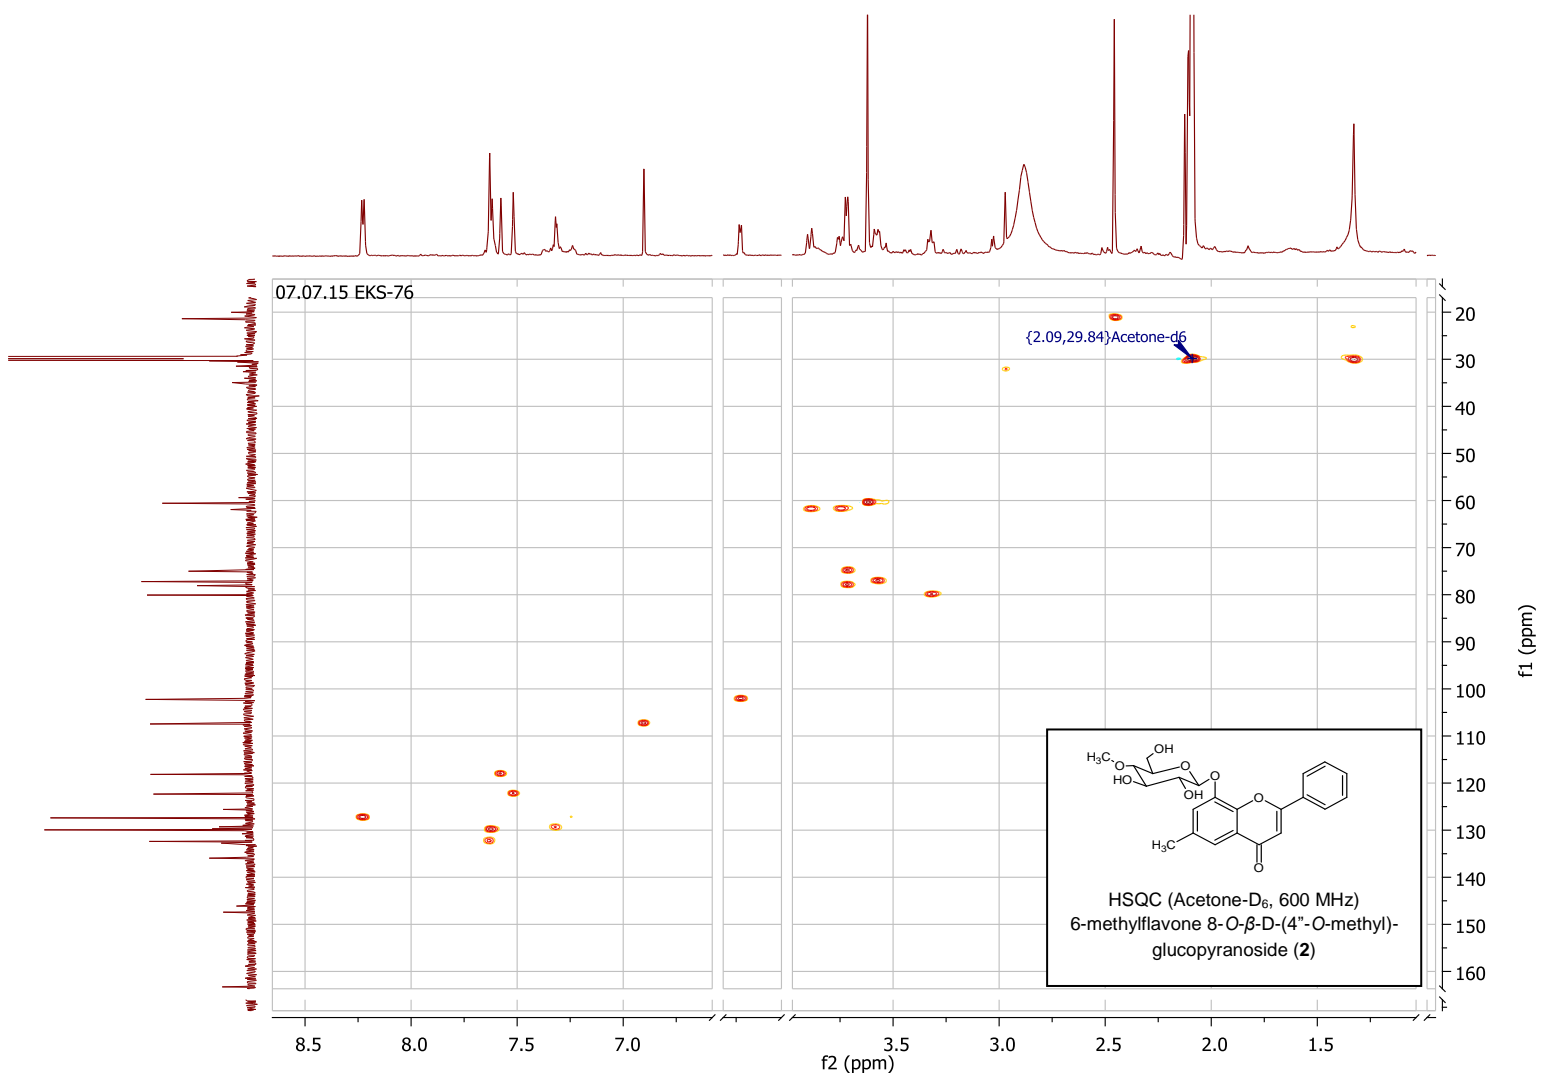

S12 Fig. HSQC NMR of 6-methylflavone 8-O-β-D-(4''-O-methyl)-glucopyranoside (2) (Acetone-D<sub>6</sub>, 600 MHz).
